# Supplementary material
Source: PubMed Central journal article supplement (PMC7264442)
Supplement: mmc1.pdf [file mmc1.pdf]

**YMTHE, Volume 28**

## **Supplemental Information**

### **Enterovirus A71 Oncolysis of Malignant Gliomas**

**Xiaowei Zhang, Hanzhong Wang, Yuhan Sun, Mi Qi, Wei Li, Zhiping Zhang, Xian-En Zhang, and Zongqiang Cui**

### Supplemental Information

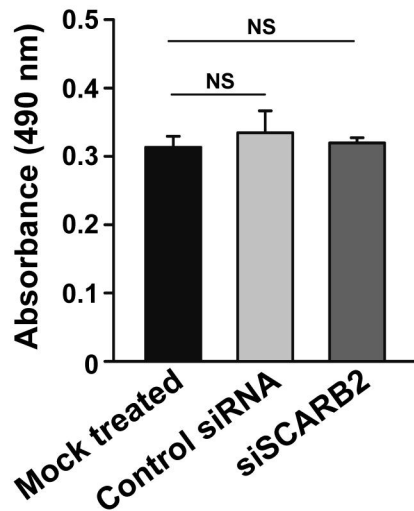

**Supplemental Figure S1.** Impact of SCARB2-specific siRNA transfection on cell viabilities of U87. U87 glioma cells were transfected with SCARB2-specific siRNA or control siRNA and cellular cytotoxicity was assessed by LDH assay at 48 h post-transfection. Bars represent the means  $\pm$  the standard deviations of three independent experiments. NS, not significant.

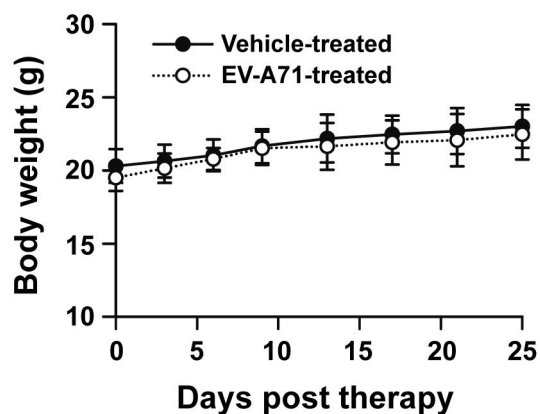

**Supplemental Figure S2.** Body weight profiles of EV-A71 BrCr-treated and vehicle-treated CD1 nu/nu mice (n = 6–8/group) bearing subcutaneous U87 tumors. Bars represent the body weight means  $\pm$  standard deviations.
